# Supplementary material for: Overweight and obesity and their associated factors among early adolescence school children in urban and rural Portugal
Source: PubMed Central journal article supplement (PMC7050717; doi:10.1186/s40795-017-0134-6), 2017-02-20
Supplement: 40795_2017_134_MOESM1_ESM.pdf [file 40795_2017_134_MOESM1_ESM.pdf]

## Questionnaire – Evaluation of the Nutritional Status

**Name of the student:**

**Date of birth:**

**Educational establishment:**

**School year:            Class:            Nº:**

**Answer as correctly as possible to the following questions. Write the word 'True' on the selected option.**

**1 – Do it eat breakfast? (select only one answer)**

- a) every day
- b) less then 4 times a week
- c) never eat breakfast

**2 – Usually I eat and drink at breakfast (select all the correct answers)**

- a) bread with butter, ham, cheese
- b) cakes, cookies or other sweetmeats
- c) plain milk or yogurt
- d) chocolate milk, cocoa or coffee

**3 – Relatively to lunch and dinner (select only one answer)**

- a) always eat soap at least once a day
- b) only eat soap 4 or less times a week

c) never eat soap

**Relatively to vegetables and salads (select only one answer)**

a) eat salads and/or boiled vegetables every day

b) only eat salads and/or boiled vegetables 4 or less times a week

c) usually never eat salads and/or boiled vegetables

**Fish and/or meat (select only one answer)**

a) eat fish and/or meat every day

b) eat fish and/or meat at least 4 times a week

c) eat fish and/or meat less than 4 times a week

d) usually don't eat fish nor meat

**4 – Fruit (don't consider canned fruit) (select only one answer)**

a) eat daily 3 or more pieces of fruit

b) eat at least 1 piece of fruit daily

c) eat 4 or less pieces of fruit per week

d) usually never eat fruit

**5 – Candies, desserts, chocolates, pizzas, hamburgers, ice creams (select only one answer)**

a) every day I eat 1 of the mentioned foods

b) eat at least 4 times a week one of the mentioned foods

c) eat less than 4 times a week one of the mentioned foods

d) usually don't eat any of the mentioned foods

**6 – Soft drinks, capsule juices or tin with or without gas, coca-cola (select only one answer)**

a) drink daily one of the mentioned drinks

b) drink more than 4 times a week one of the mentioned drinks

c) drink less than 4 times a week one of the mentioned drinks

d) usually don't drink any of the mentioned drinks

**7 – Number of daily meals (select only one answer)**

a) I have more than 4 meals a day

b) usually I have 4 meals a day

c) usually I have 3 meals a day

### **Leisure time**

#### **Sports or cultural activities**

**1- Do you practice any sport activity, besides the Physical Education you have at school?**

Yes

No

Which one?

**If you do, how many hours a week?**

a) 3 or more hours

b) 2 hours

c) less than 2 hours

**Do you usually walk more than 30 minutes a day? (select only one answer)**

a) Yes

b) No

**Daily habits – television or videogames like Game Boy, Playstation, PSP**

Daily you watch television and/or play videogames more than 120 minutes (or 2 hours)

Daily you watch television and/or play videogames less than 120 minutes (or 2 hours)
